# Supplementary material for: Films of substituted zinc phthalocyanines as active layers of chemiresistive sensors for ammonia detection
Source: Royal Society of Chemistry journal article supplement (doi:10.1039/d3nj03400c), 2023-01-01
Supplement: d3nj03400c1.pdf [file d3nj03400c1.pdf]

## Supplementary Information

### Films of substituted zinc phthalocyanines as active layers of chemiresistive sensors for ammonia detection

Victoria Ivanova, Darya Klyamer, Gülenay Tunç<sup>2</sup>, Fatma Dinçer Gürbüz<sup>2</sup>, Devrim Atilla<sup>2</sup>,  
Ayşe Gül Gürek<sup>2</sup>,\* Aleksandr Sukhikh<sup>1</sup>, Tamara Basova<sup>1\*</sup>

<sup>1</sup>*Nikolaev Institute of Inorganic Chemistry SB RAS, 3 Lavrentiev Pr., Novosibirsk, 630090, Russia*

<sup>2</sup>*Department of Chemistry, Faculty of Fundamental Sciences, Gebze Technical University, 41400, Gebze, Kocaeli, Turkey*

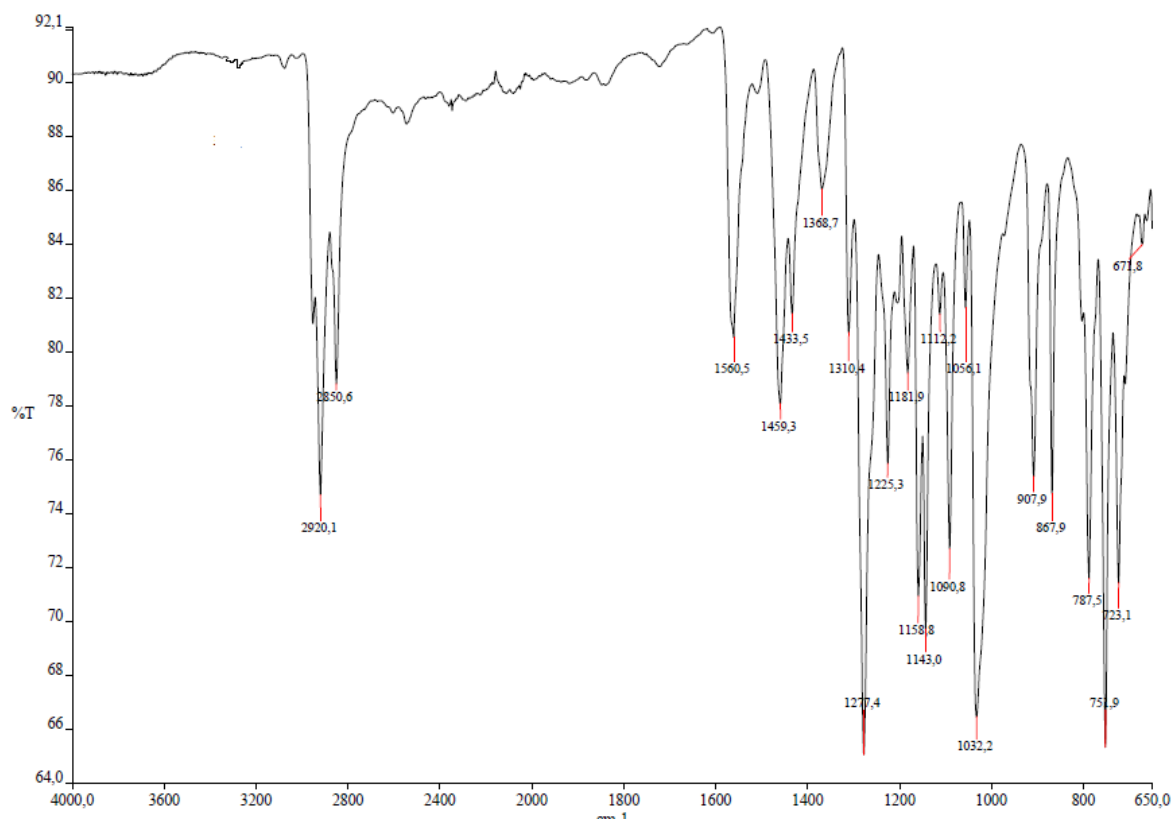

**Figure S1.** FT-IR spectrum of compound **ZnPc-4**

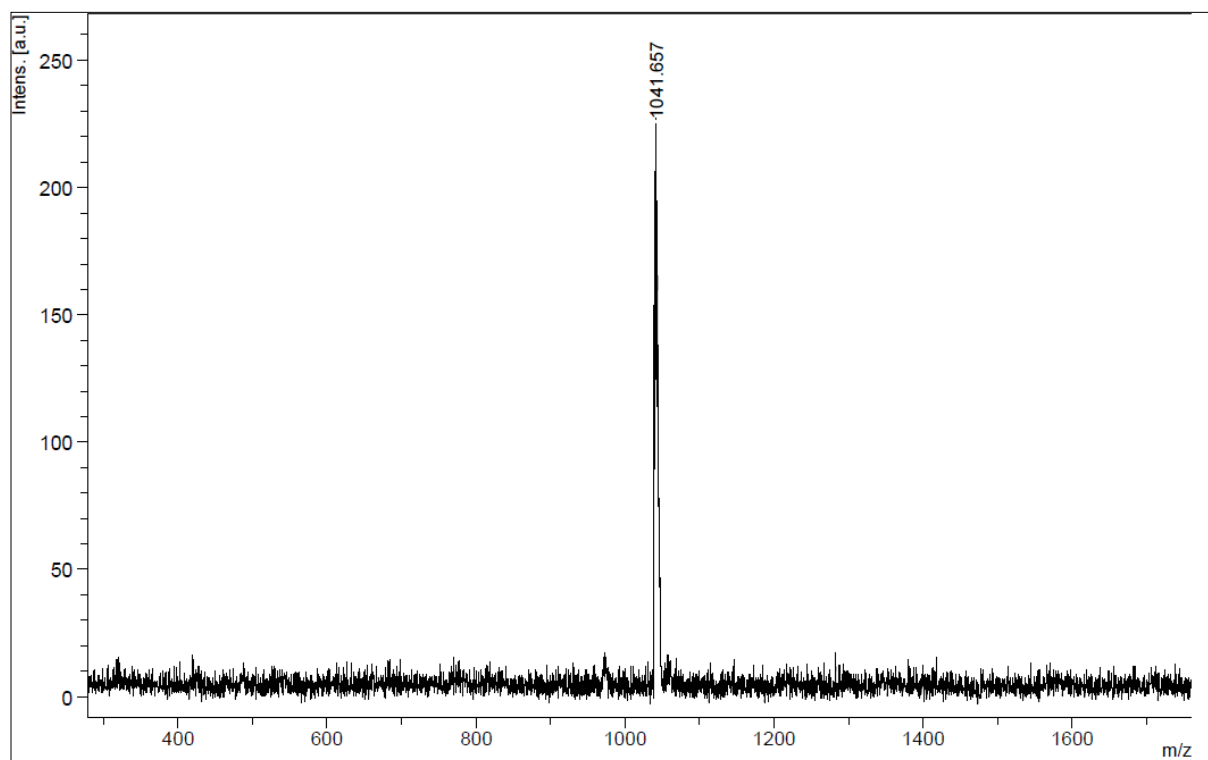

**Figure S2.** MS (MALDI-TOF) spectrum of compound **ZnPc-4** (Matrix: DHB)

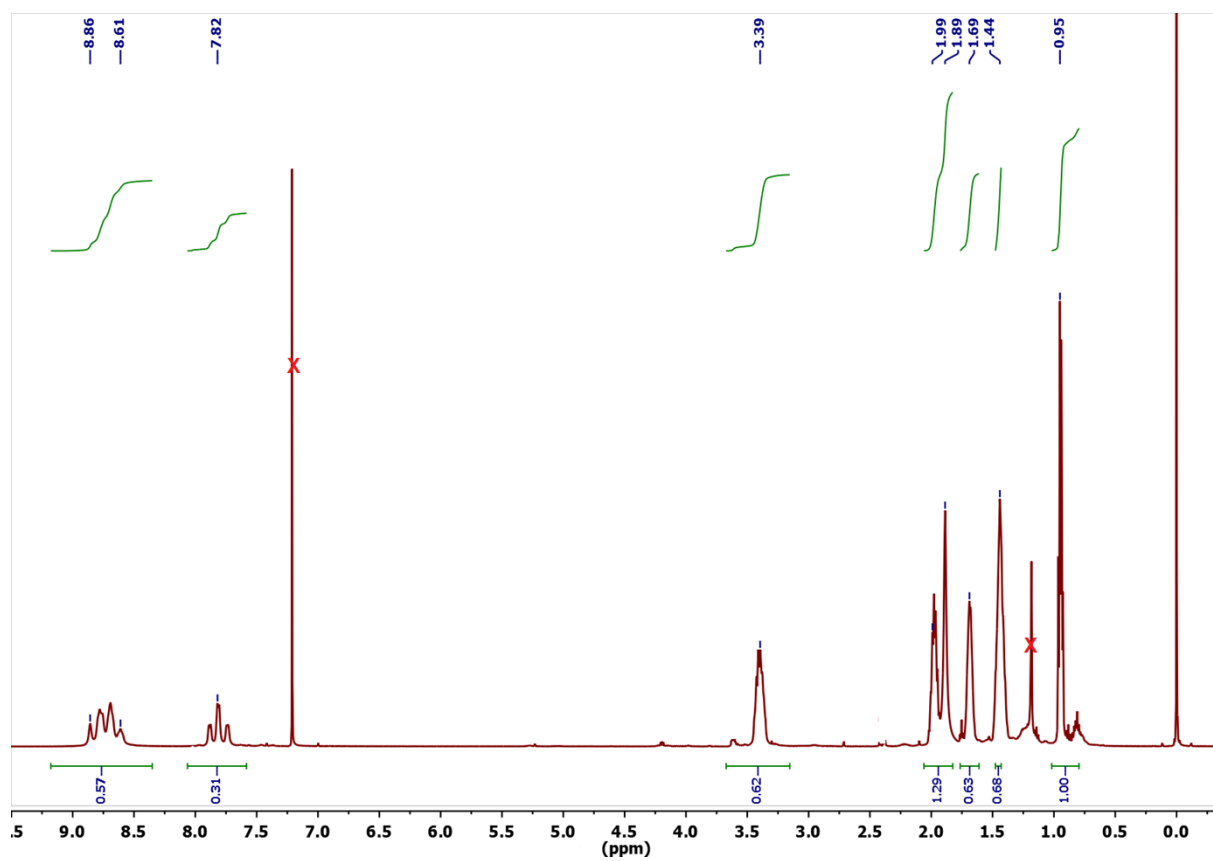

**Figure S3.**  $^1\text{H-NMR}$  spectrum of compound **ZnPc-4** (in  $\text{CDCl}_3$ + 2 drops,  $\text{DMSO-}d_6$ )
